# Supplementary material for: Pathogenetic and clinical study of a patient with thrombocytopenia due to the p.E527K gain-of-function variant of SRC
Source: PubMed Central journal article supplement — Haematologica. 2020 Sep 28;106(3):918–22. doi: 10.3324/haematol.2020.268516 (PMC7927995; doi:10.3324/haematol.2020.268516), 2020-09-28
Supplement: 2020_268516-Disclosures_Contributions.pdf [file 2020_268516-Disclosures_Contributions.pdf]

Haematologica  
HAEMATOL/2020/268516  
Version 3

Pathogenetic and clinical study of a patient with thrombocytopenia due to the p.E527K gain-of-function variant of SRC

Serena Barozzi, Christian A. Di Buduo, Caterina Marconi, Valeria Bozzi, Marco Seri, Francesca Romano, Alessandra Balduini, and Alessandro Pecci

Disclosures: none

Contributions: SB and CADB performed research, analyzed and interpreted the laboratory data, wrote the manuscript. CM,VB, MS, performed research and analyzed and interpreted the laboratory data. FR collected and interpreted the clinical data. AB analyzed and interpreted the laboratory data and wrote the manuscript. AP designed research, analyzed and interpreted the data, and wrote the manuscript. All the authors critically revised the manuscript and approved the final version.
